# Supplementary material for: Unique perforated graphene derived fromBougainvilleaflowers for high-power supercapacitors: a green approach
Source: Royal Society of Chemistry journal article supplement (doi:10.1039/c7nr00583k), 2017-01-01

## Electronics Supporting Information

### ESI-I. TGA Thermogram of the Boganvel (*Bougainvillea*) flower.

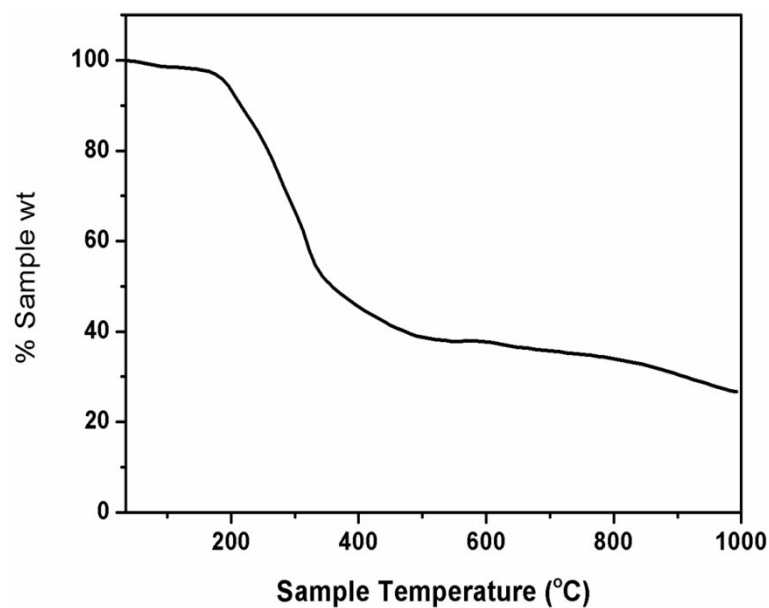

Figure S1. TGA Thermogram of the Boganvel (*Bougainvillea*) flower.

### ESI-II: HR-FETEM images of RC-B sample

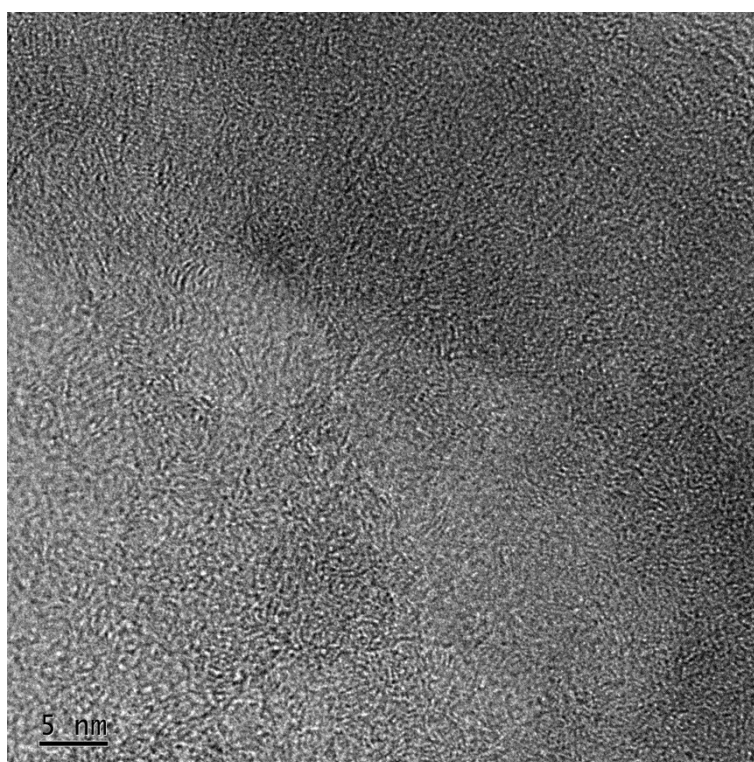

Figure S2 HR-FETEM images of RC-B sample

**ESI-III. Schematic diagram of conductivity measurements under pressure (70.1 kg/cm<sup>2</sup>).**

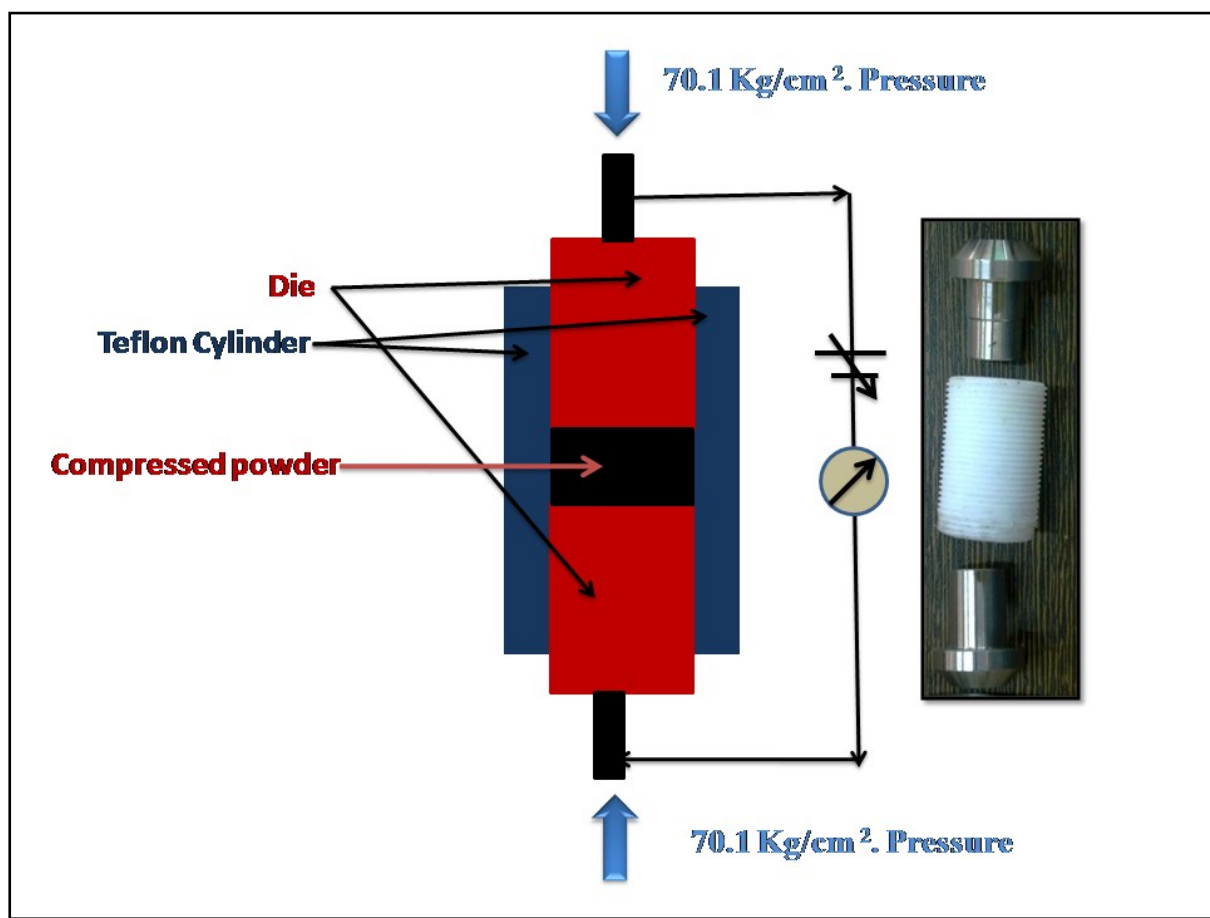

Figure S3. Schematic diagram of conductivity measurements under pressure (70.1 kg/cm<sup>2</sup>).

**ESI-IV. Table S1 Comparison of the properties of carbon materials synthesized from waste and their use in supercapacitors**

| Natural waste Material           | Maximum capacitance (F g <sup>-1</sup> ) | Electrolyte                         | Energy density (WhKg <sup>-1</sup> ) | Ref. No. |
|----------------------------------|------------------------------------------|-------------------------------------|--------------------------------------|----------|
| Acacia Gum                       | 272 at 1.0 A g <sup>-1</sup>             | 6 M KOH                             | 7.76 at 500 WKg <sup>-1</sup>        | 5        |
| Paulownia Flower                 | 297 at 1.0 A g <sup>-1</sup>             | 1 M H <sub>2</sub> SO <sub>4</sub>  | 44.5 at 247 WKg <sup>-1</sup>        | 7        |
| Pistachio nutshell               | 261 at 0.2 A g <sup>-1</sup>             | 6 M KOH                             | 10 at 52000 WKg <sup>-1</sup>        | 12       |
| Human Hair                       | 340 at 1.0 A g <sup>-1</sup>             | 6 M KOH                             | 45.33 at 0.1A g <sup>-1</sup>        | 23       |
| Bamboo based by product          | 301 at 0.1 A g <sup>-1</sup>             | 6 M KOH                             | 9.50 at 25 WKg <sup>-1</sup>         | 34       |
| Honey                            | 271 at 1.0 A g <sup>-1</sup>             | 6 M KOH                             | --                                   | 35       |
| Corn Husk                        | 350 at 1.0 A g <sup>-1</sup>             | 1 M Na <sub>2</sub> SO <sub>4</sub> | 21 at 5600 WKg <sup>-1</sup>         | 38       |
| high-ash-content sewage sludge   | 379 at 0.5 A g <sup>-1</sup>             | 6 M KOH                             | 30.5 at 181.2 WKg <sup>-1</sup>      | 39       |
| natural product of alkali lignin | 64 at 0.4 A g <sup>-1</sup>              | 6 M KOH                             | 5.67 at 181.2 WKg <sup>-1</sup>      | 40       |
| Rice Husk                        | 250 at 1.0 A g <sup>-1</sup>             | 6 M KOH                             | 22.2 at 400 WKg <sup>-1</sup>        | 41       |

**ESI-V Photograph of the supercapacitor device**

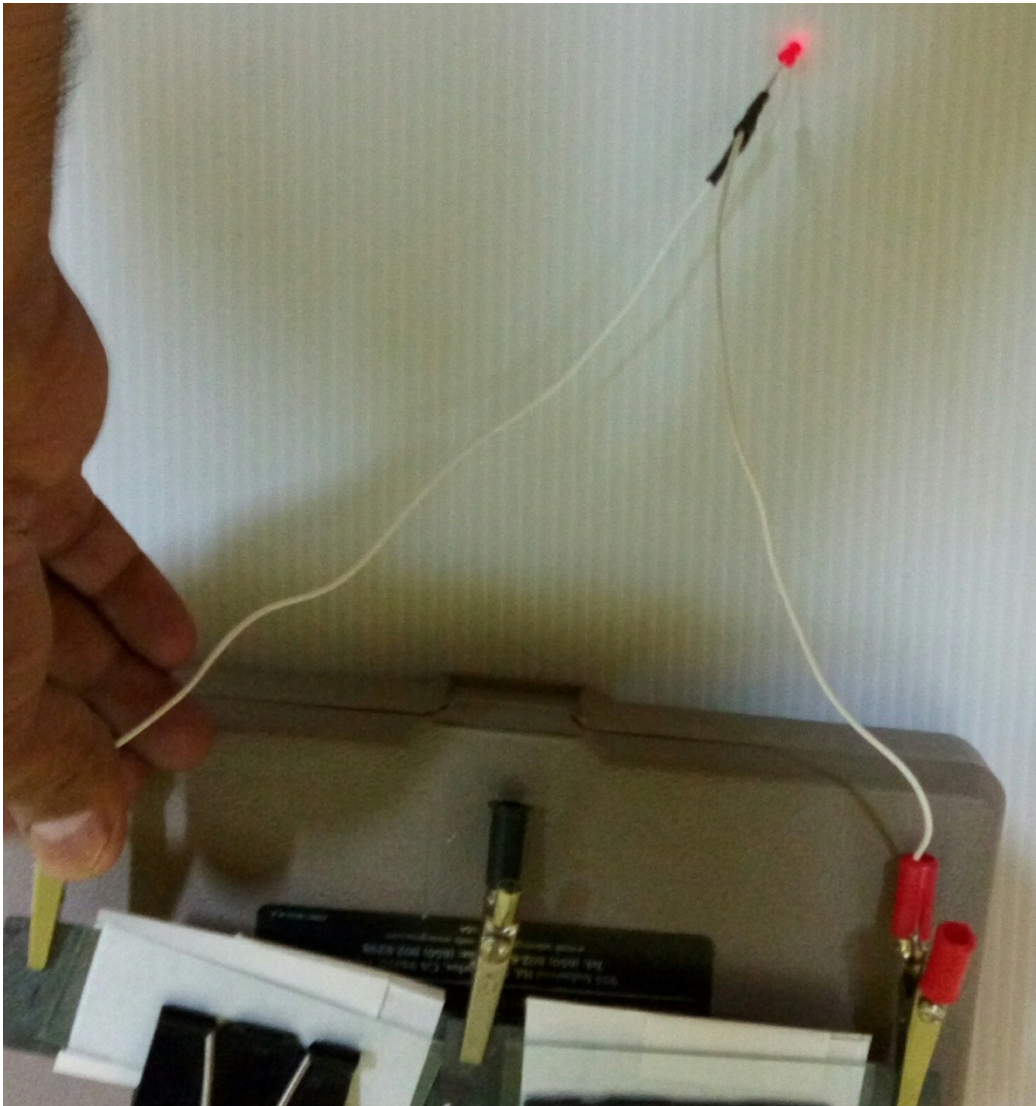

Supplement: c7nr00583k1.pdf [file c7nr00583k1.pdf]
